# Supplementary material for: Synthesis of N-alkyl and N-aryl isoquinolones and derivatives via Pd-catalysed C–H activation and cyclization reactions
Source: Royal Society of Chemistry journal article supplement (doi:10.1039/c2ob26668g), 2012-01-01

## Synthesis of *N*-alkyl and *N*-aryl isoquinolones and derivatives *via* Pd catalysed C–H activation and cyclization reactions

Nana Zhang, Binyao Li, Hongban Zhong, Jianhui Huang\*  
Tianjin Key Laboratory for Modern Drug Delivery & High-Efficiency,  
School of Pharmaceutical Science and Technology,  
Tianjin University, 92 Weijin Road, Nankai District, Tianjin, China  
E-mail: [jhuang@tju.edu.cn](mailto:jhuang@tju.edu.cn)

### Supporting Information:

#### Spectroscopic data:

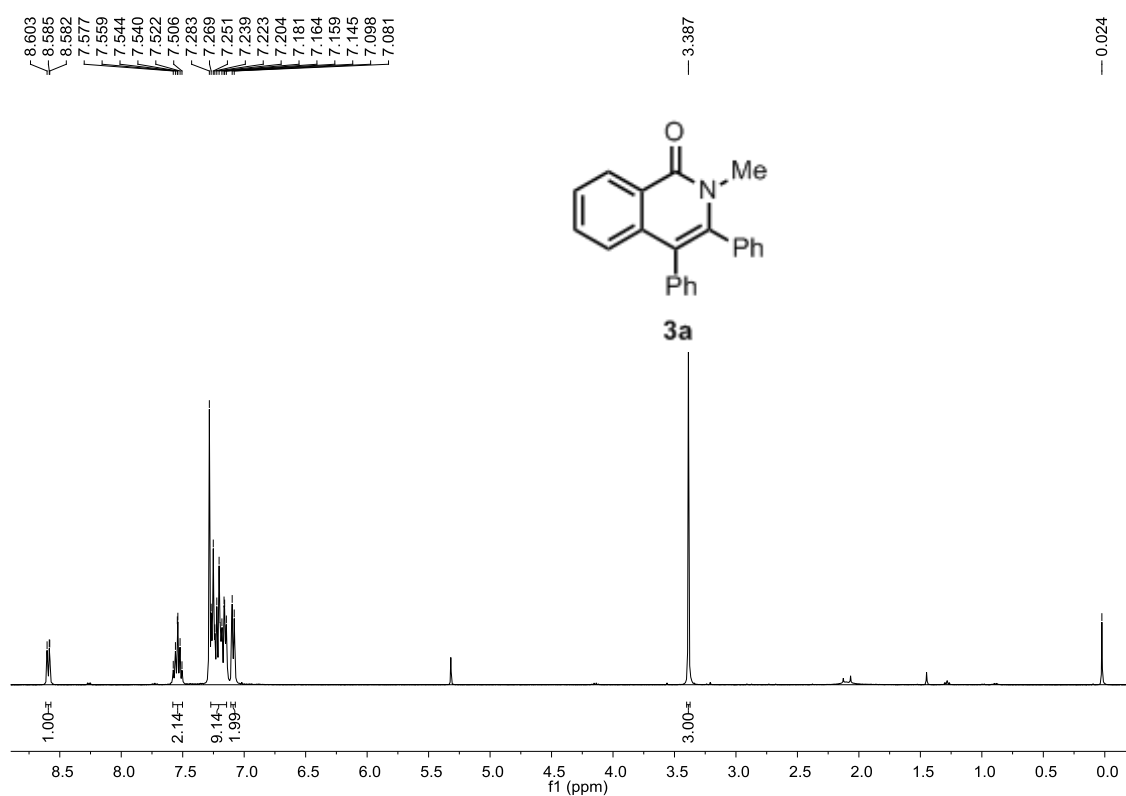

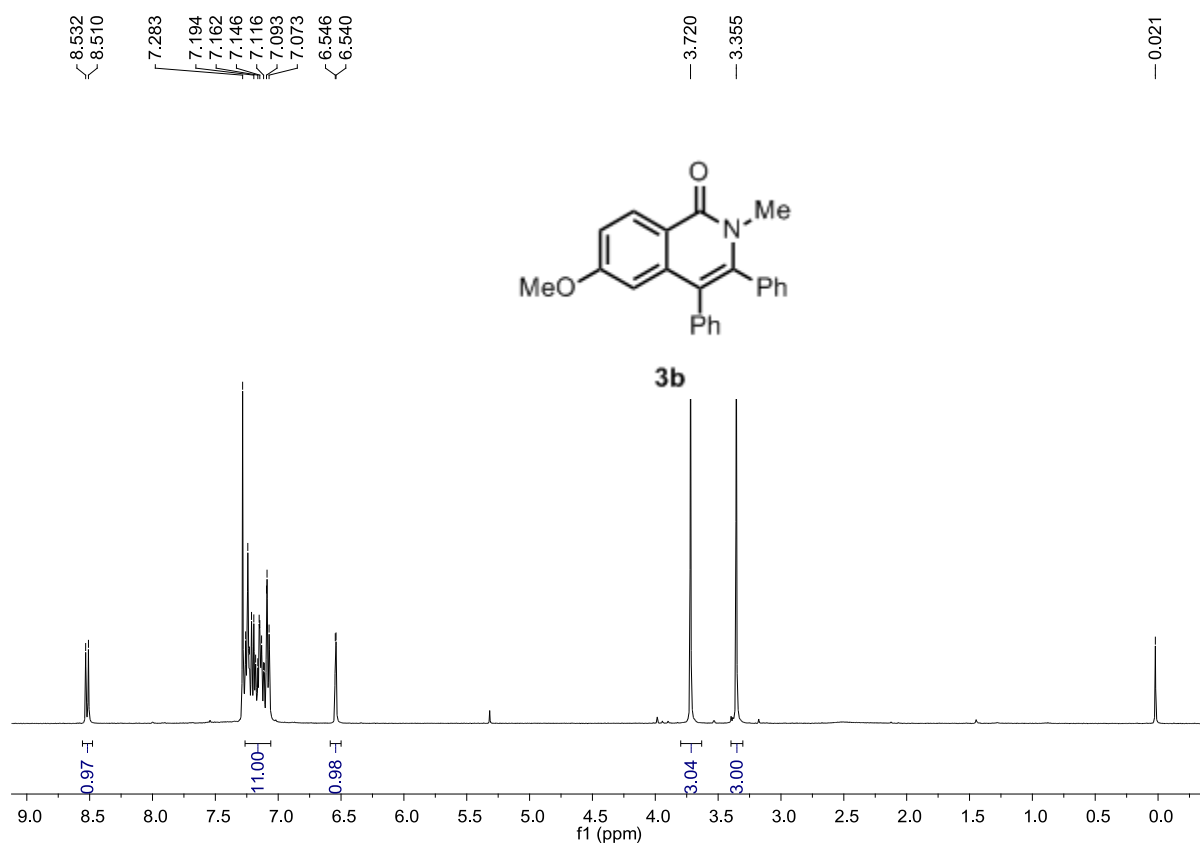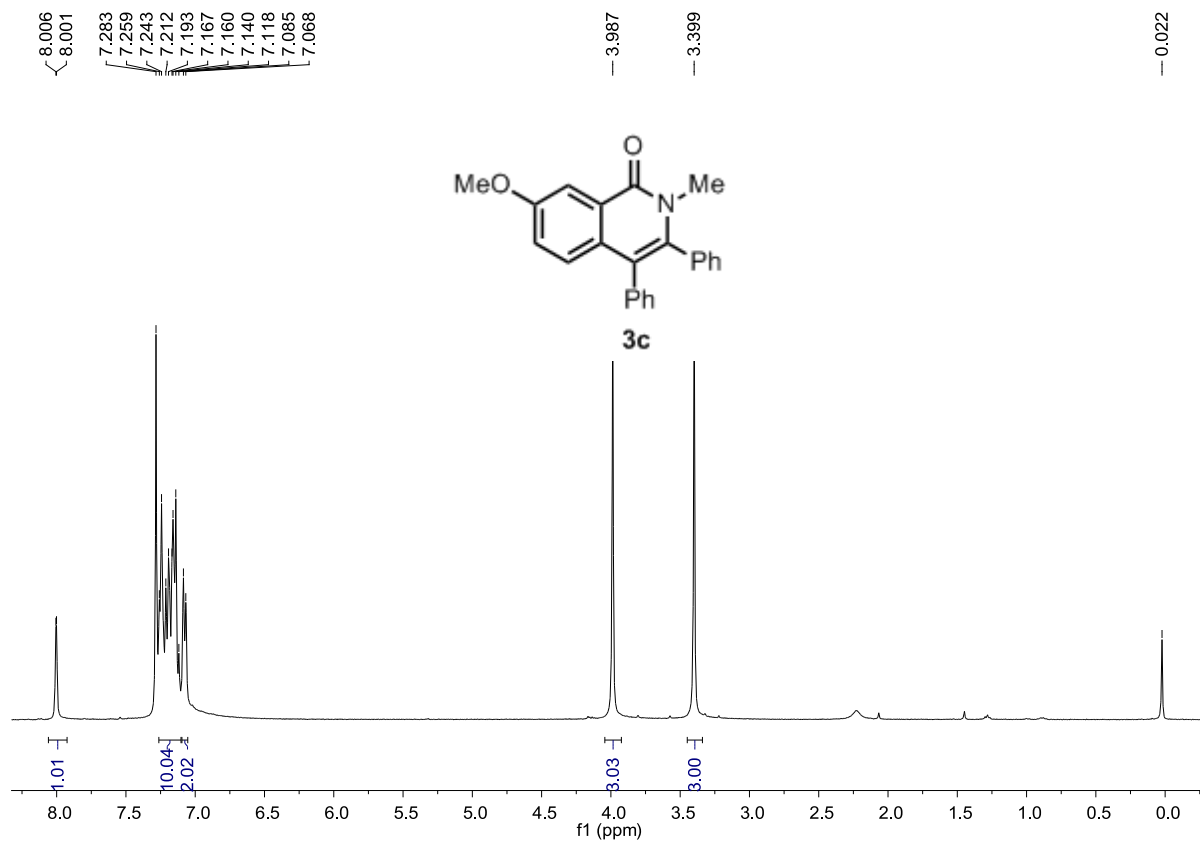

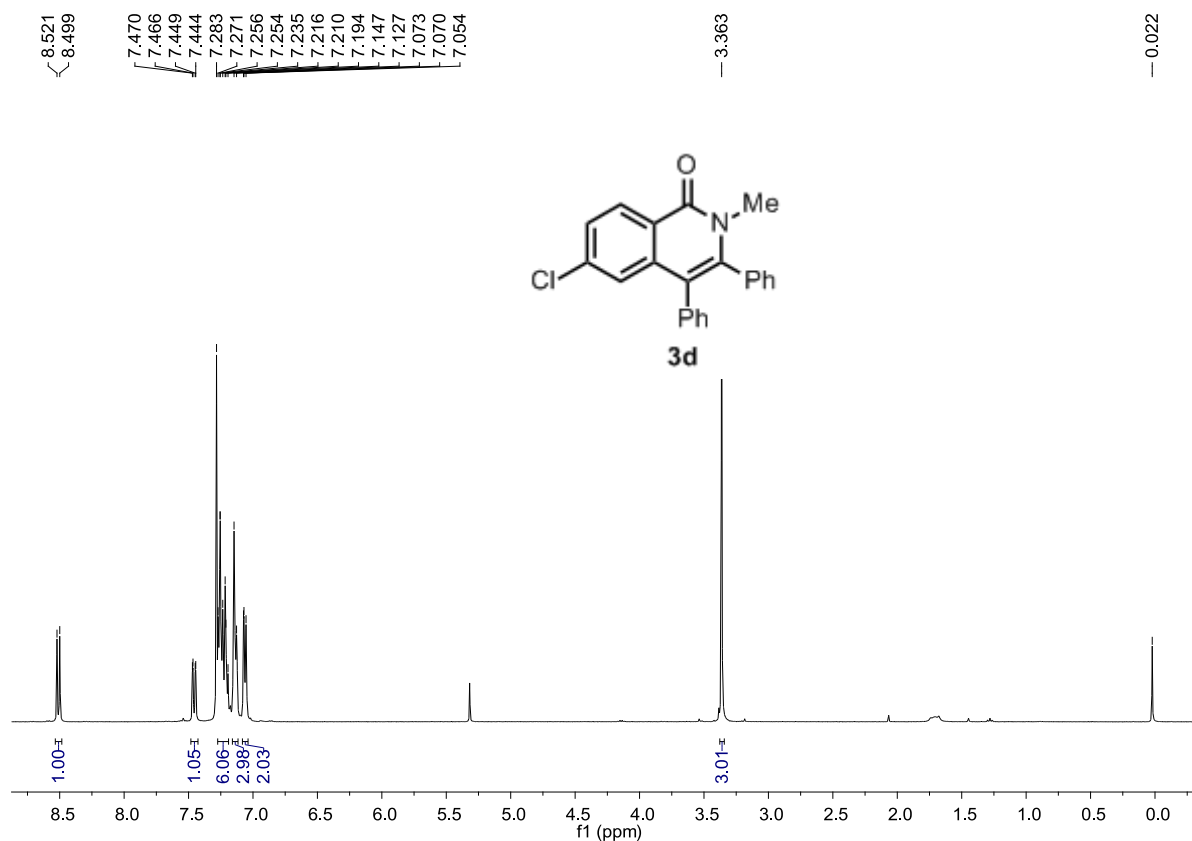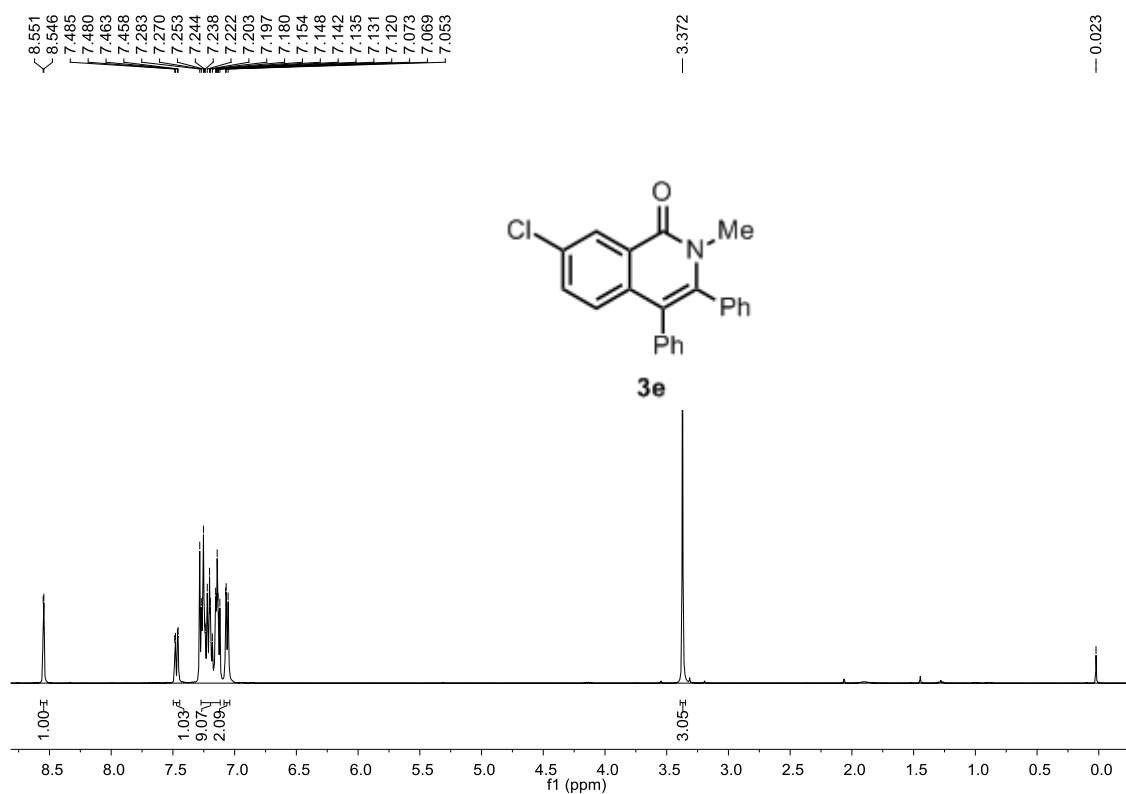

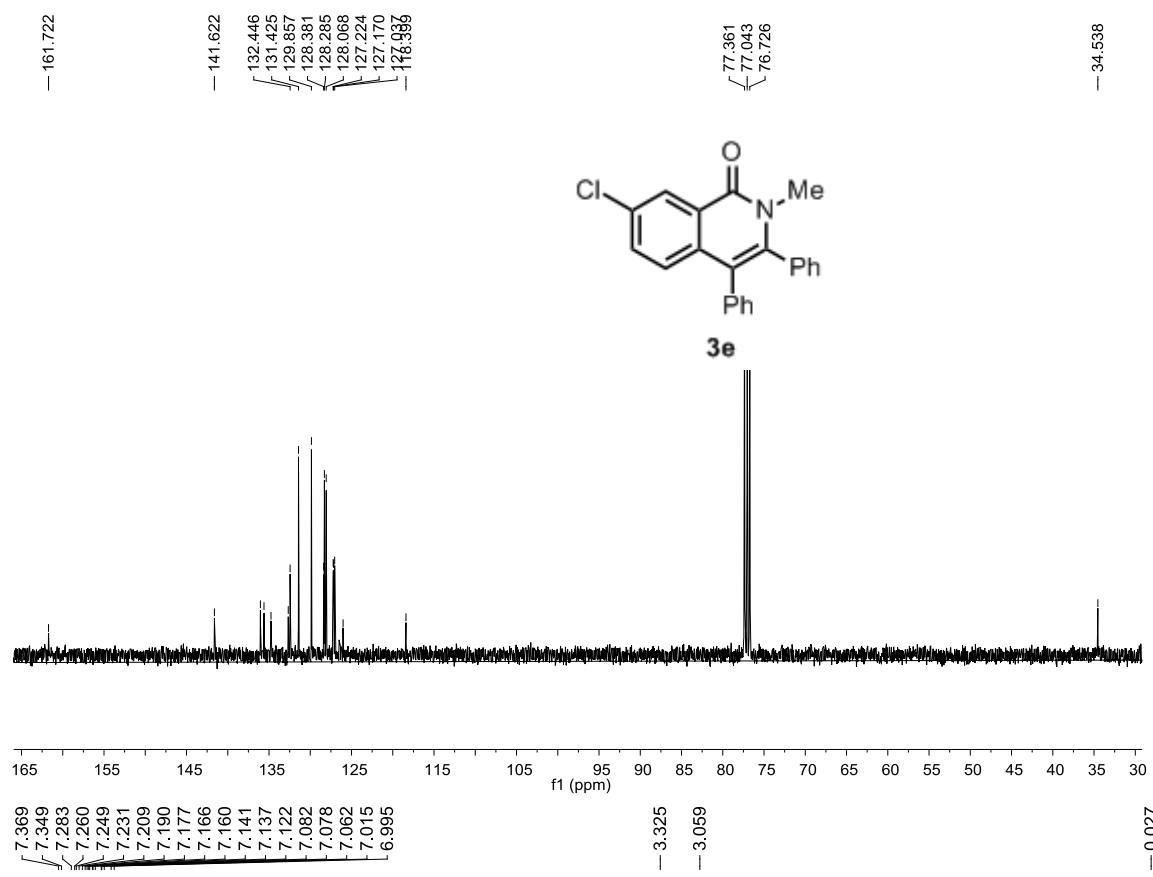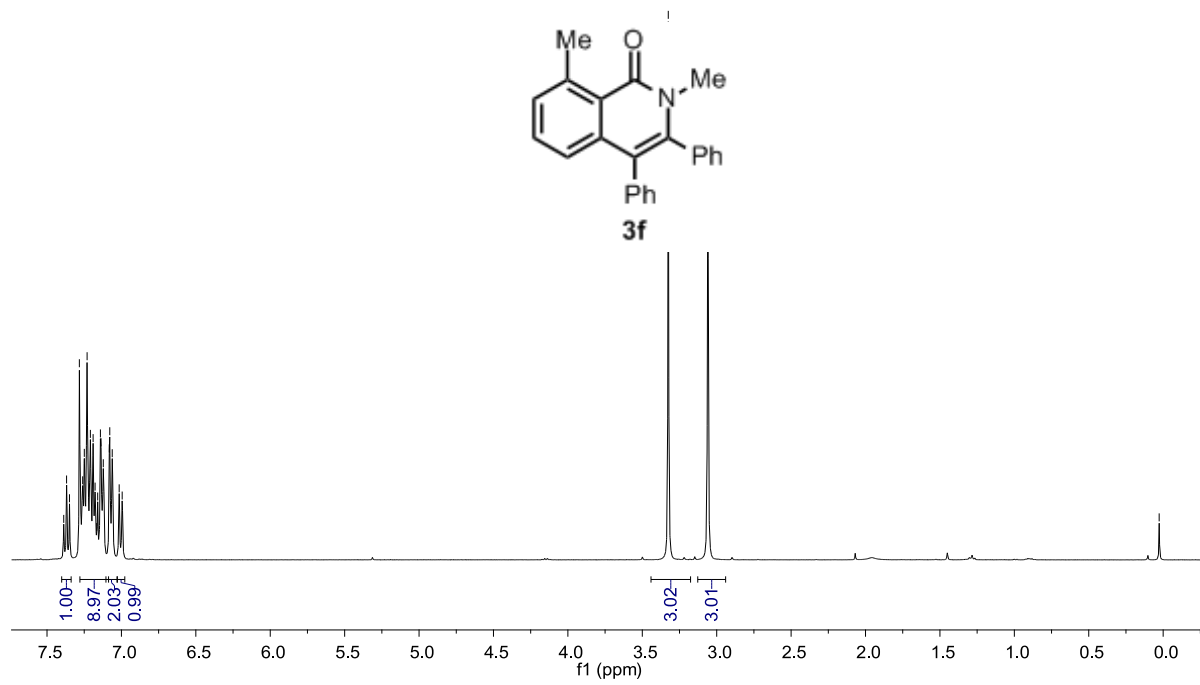

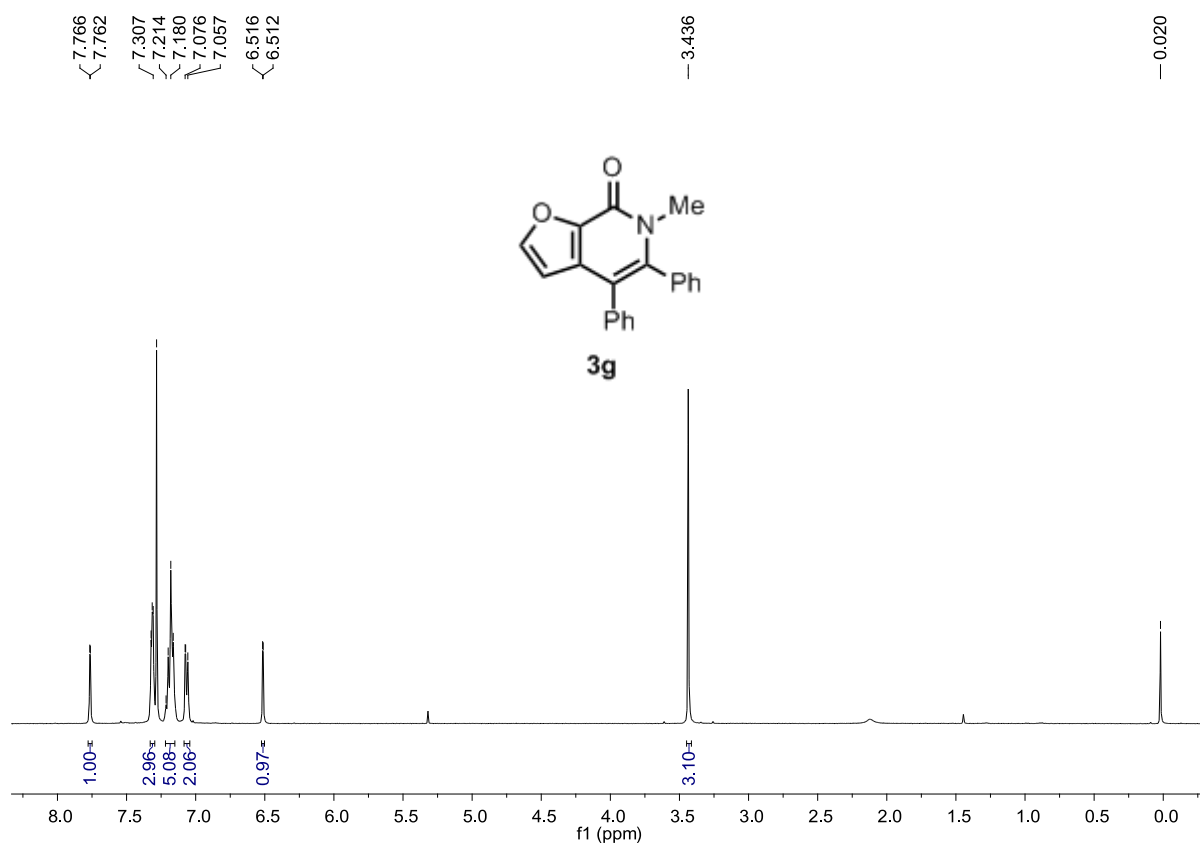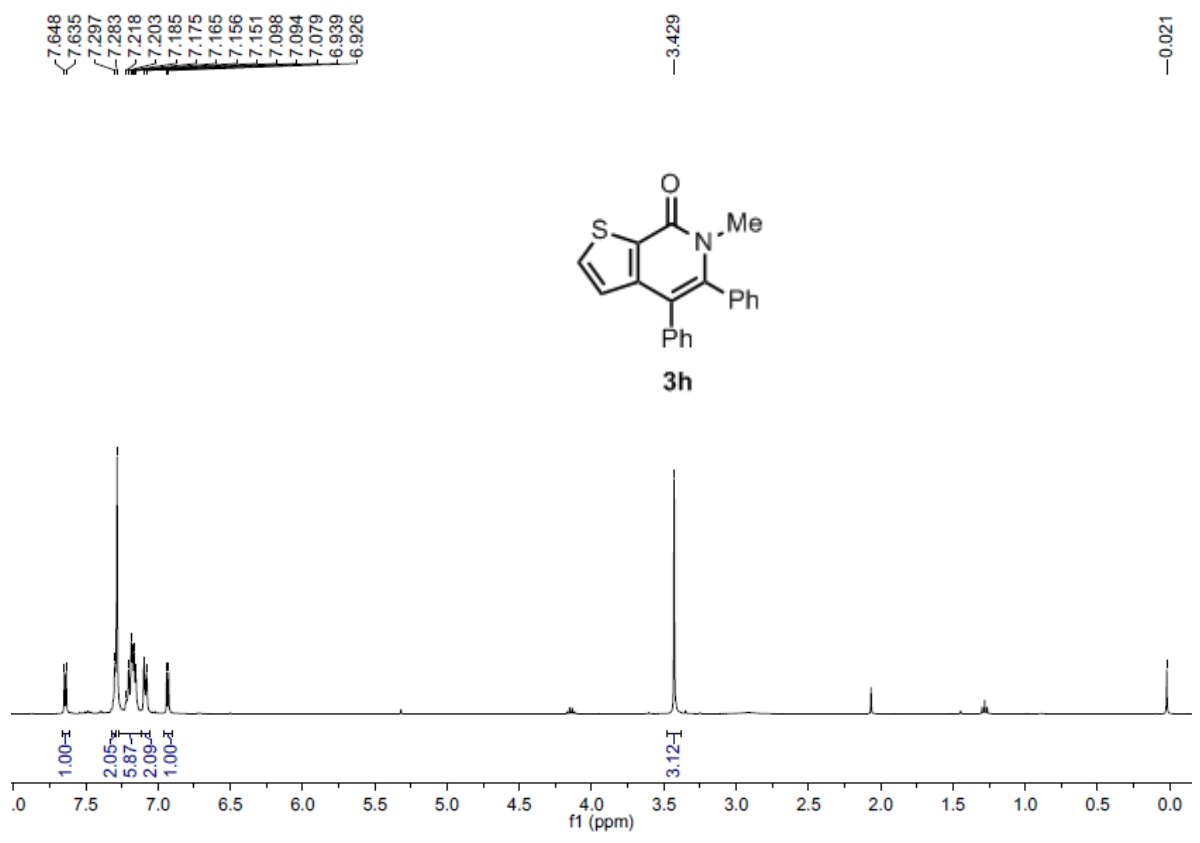

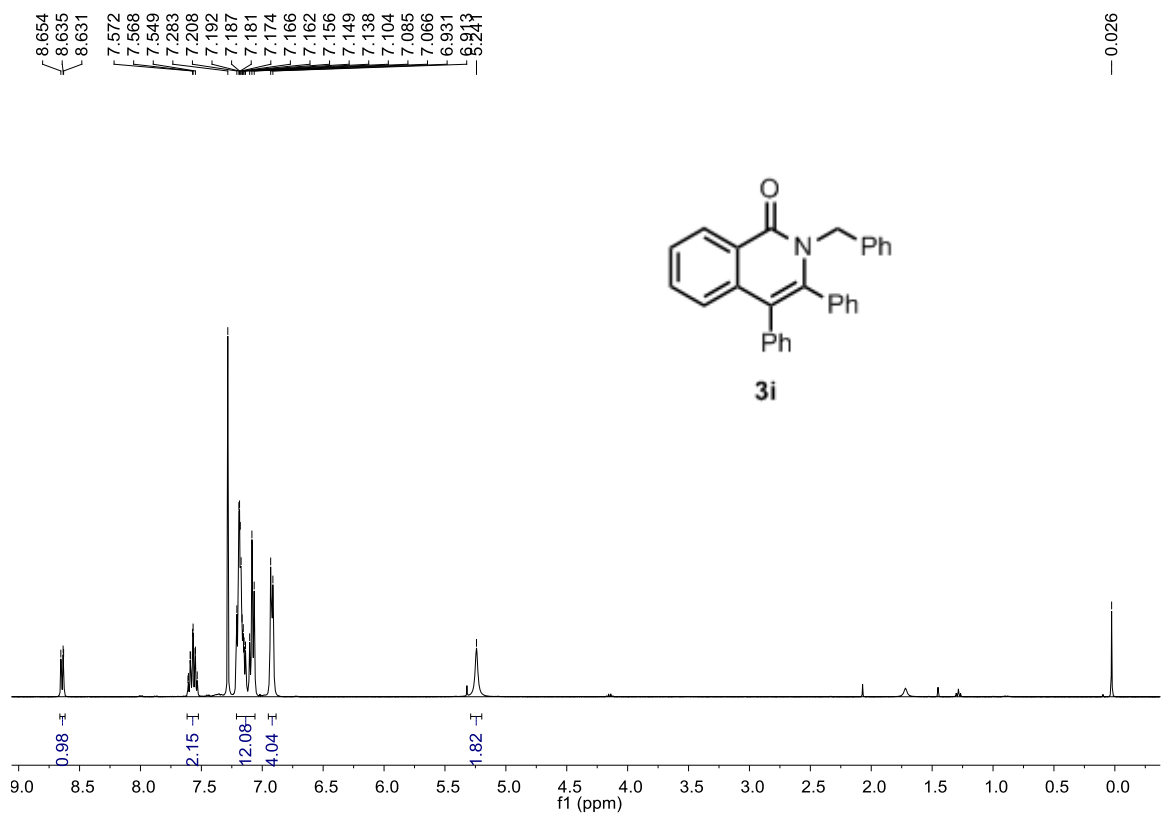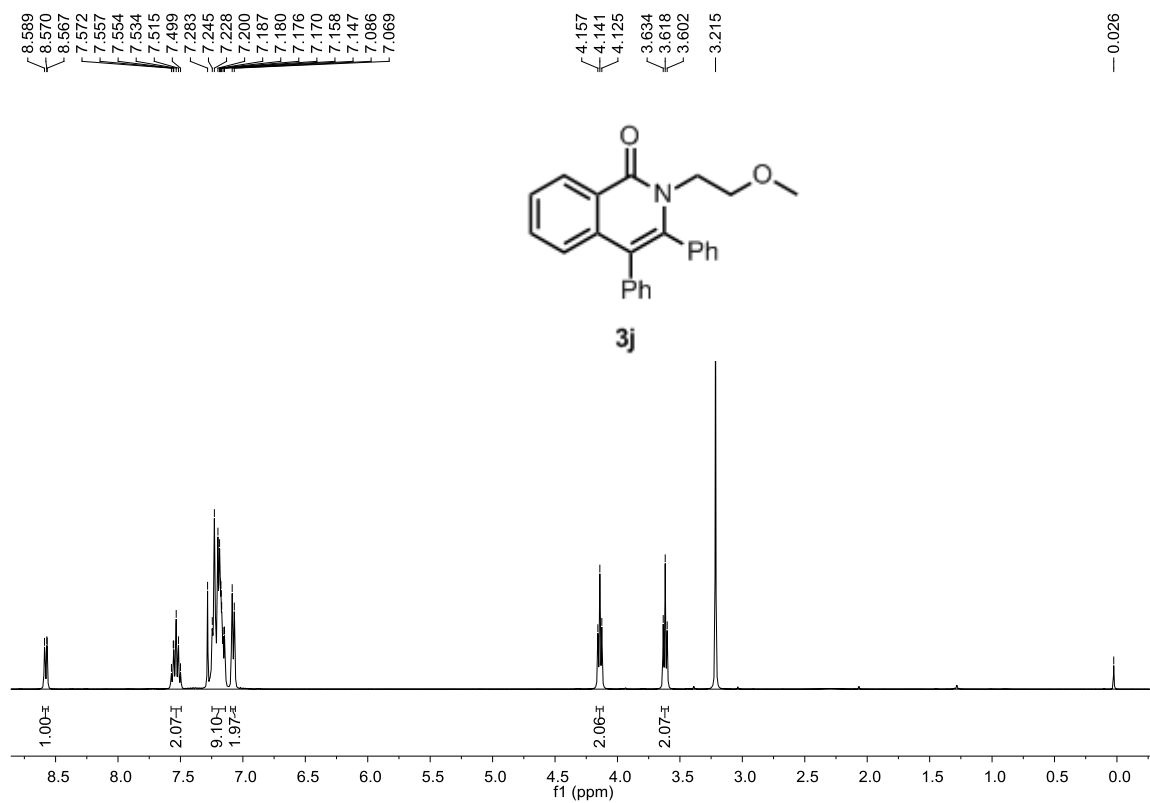

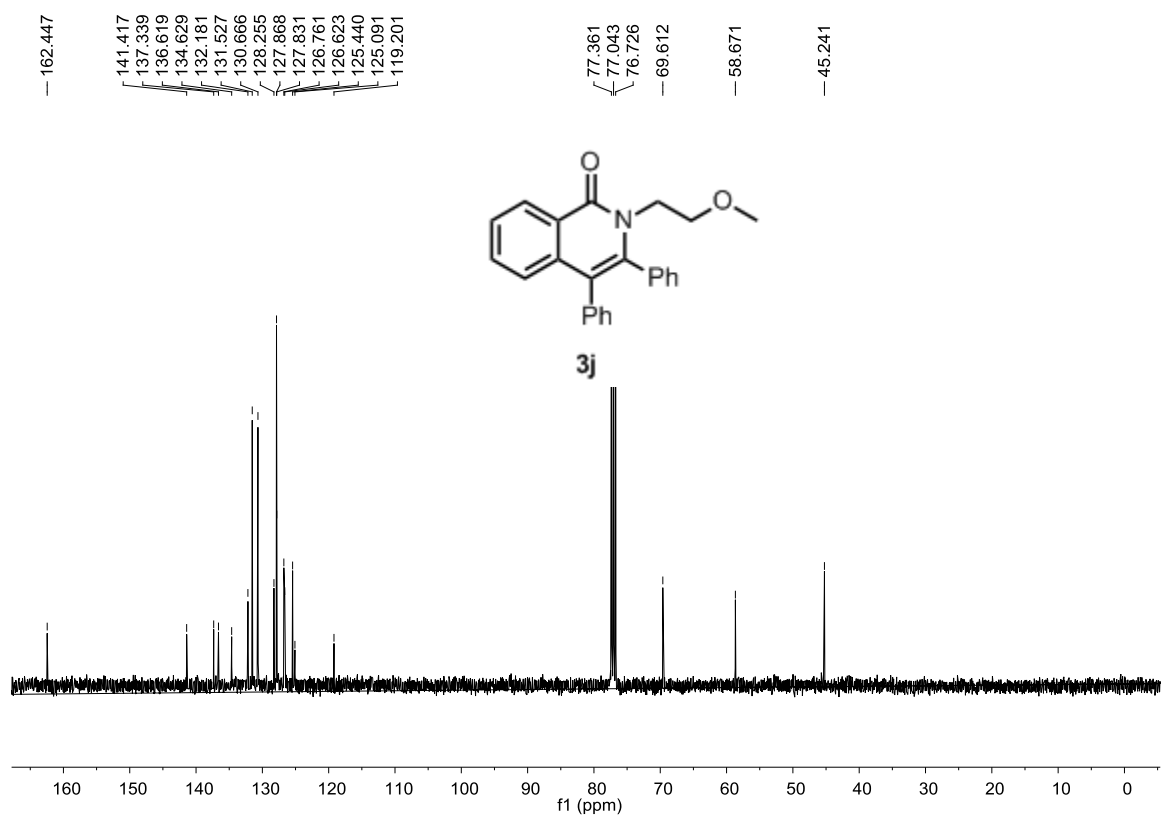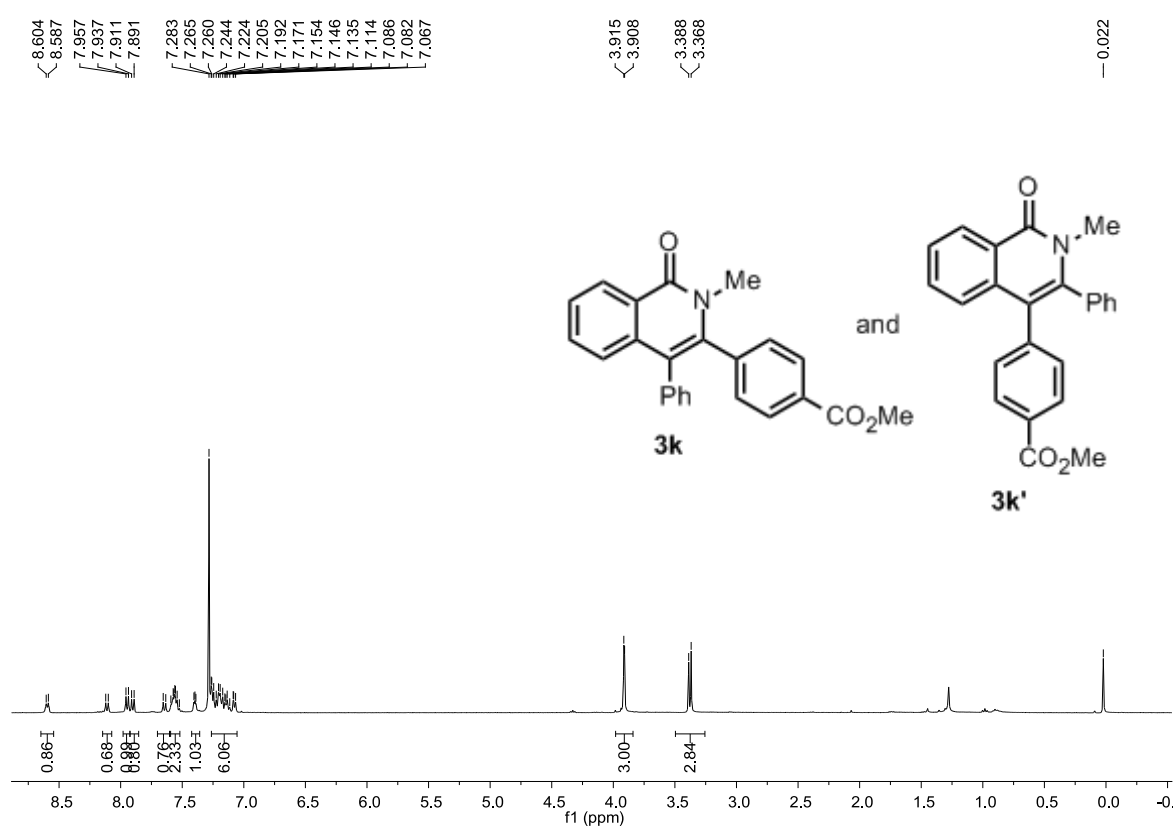

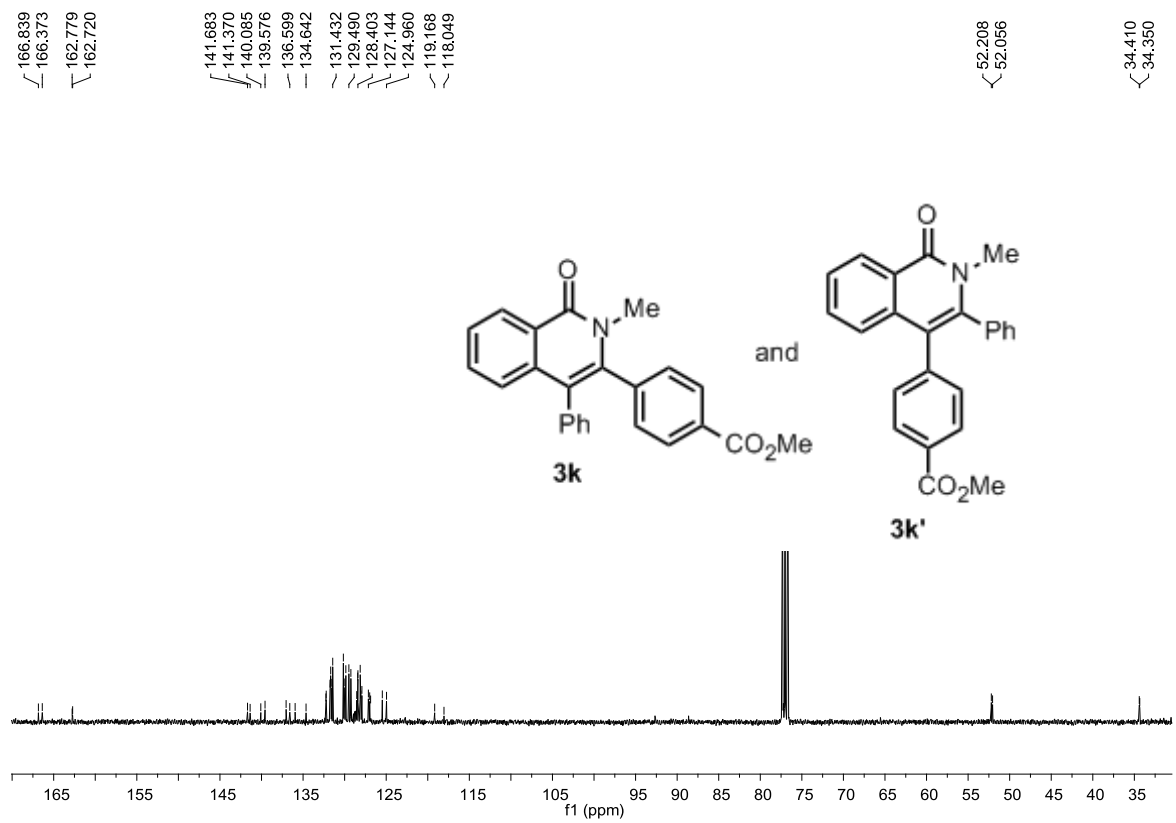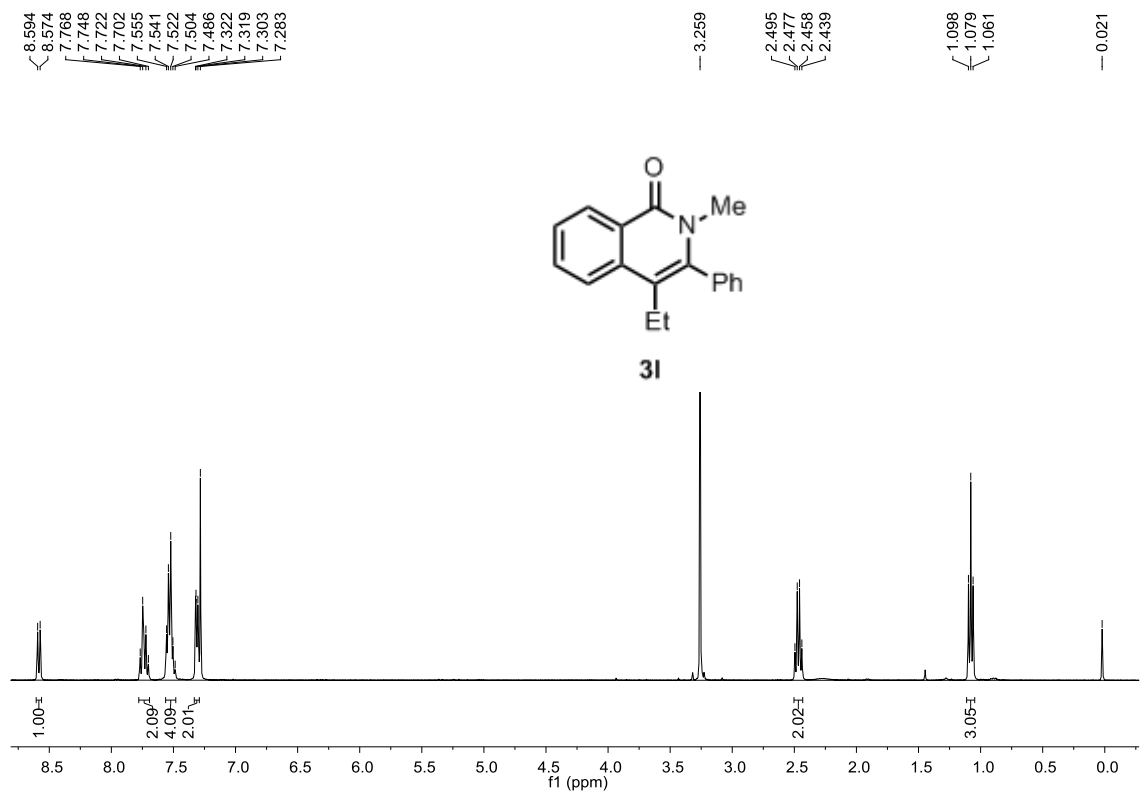



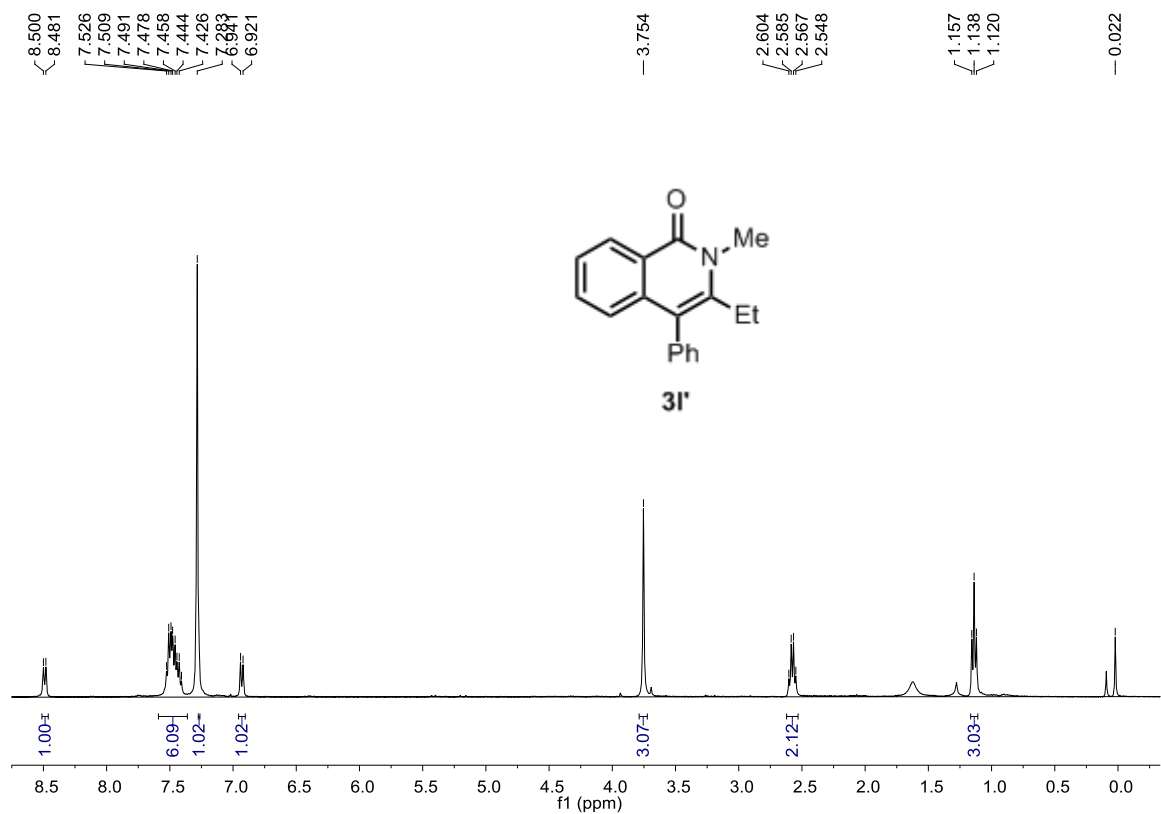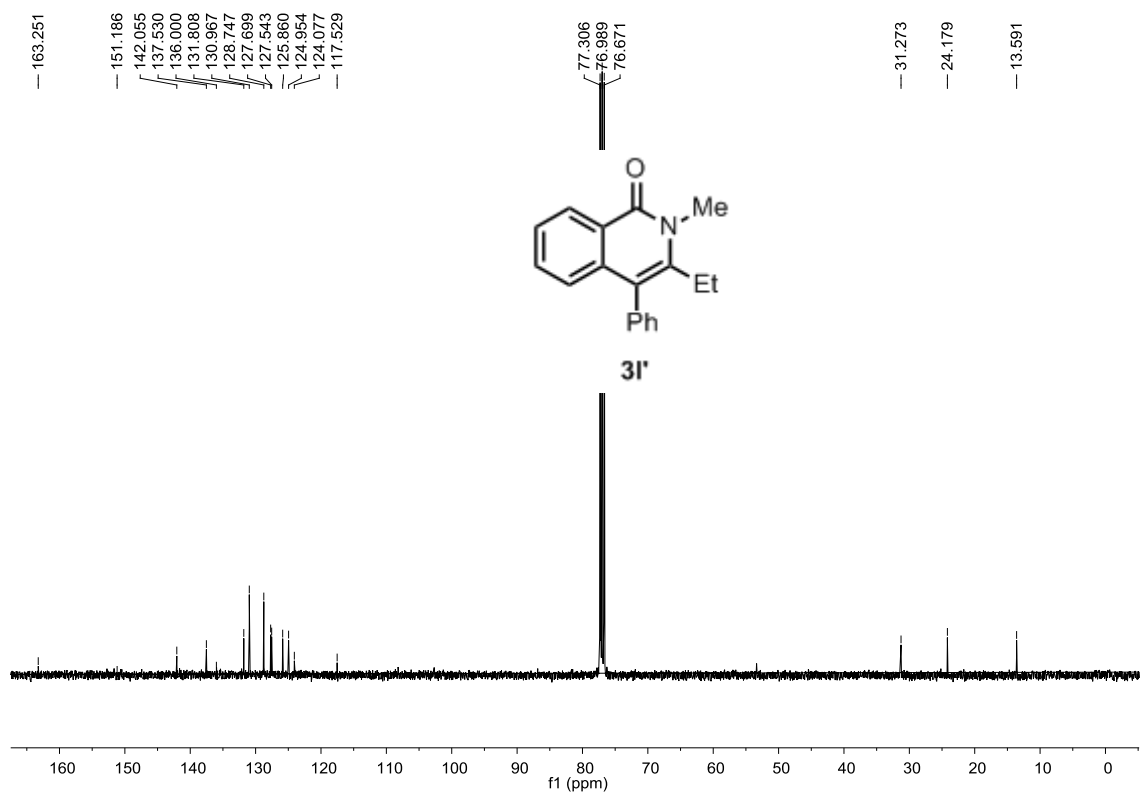

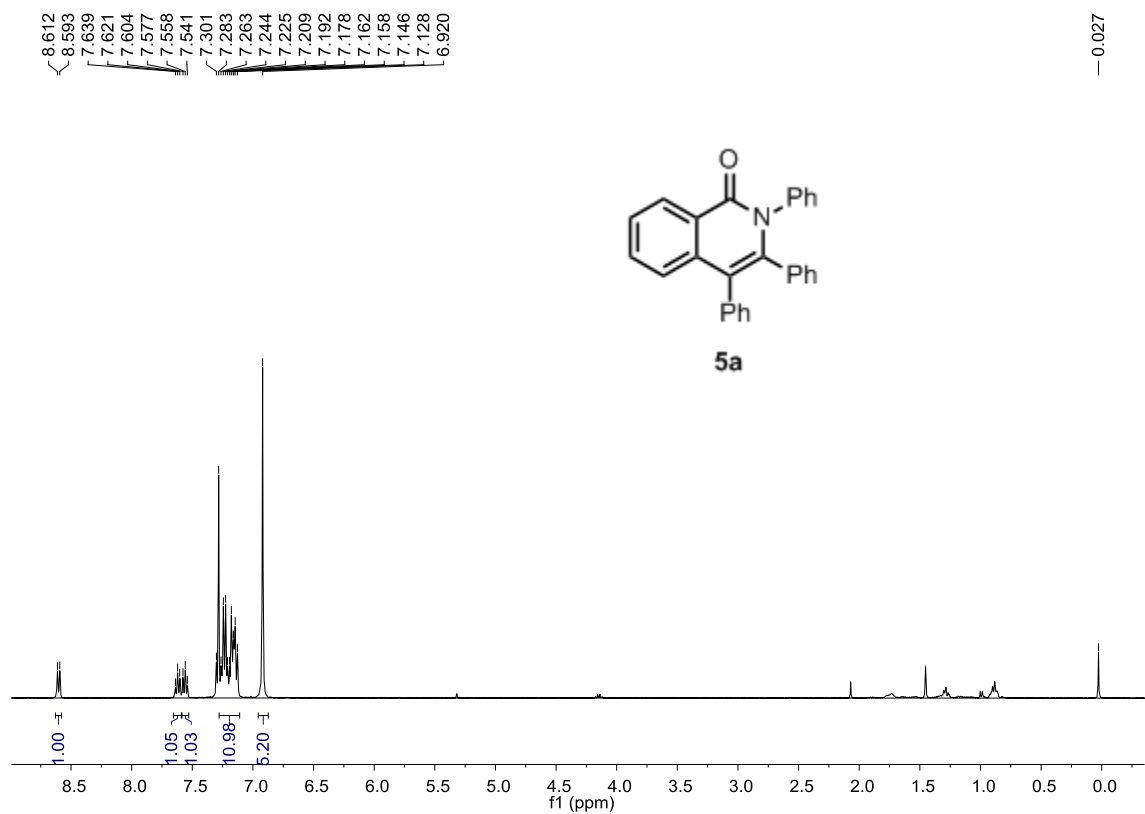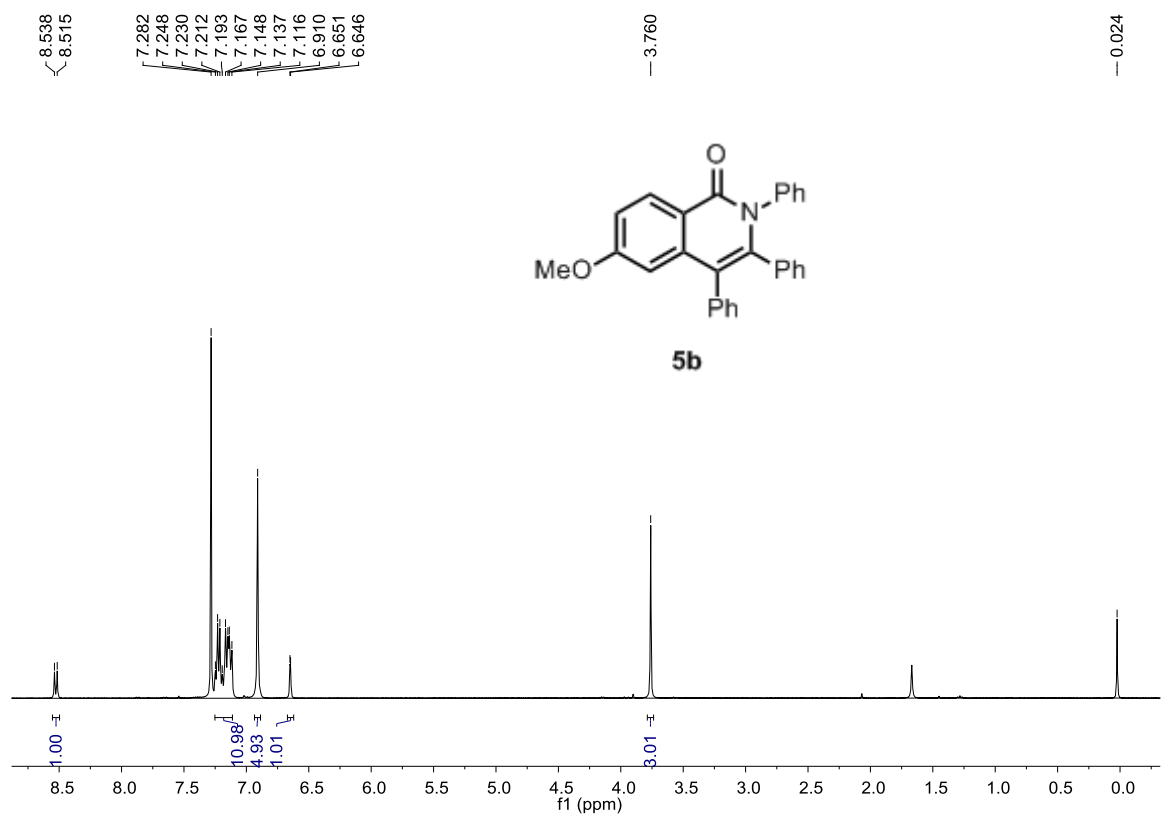

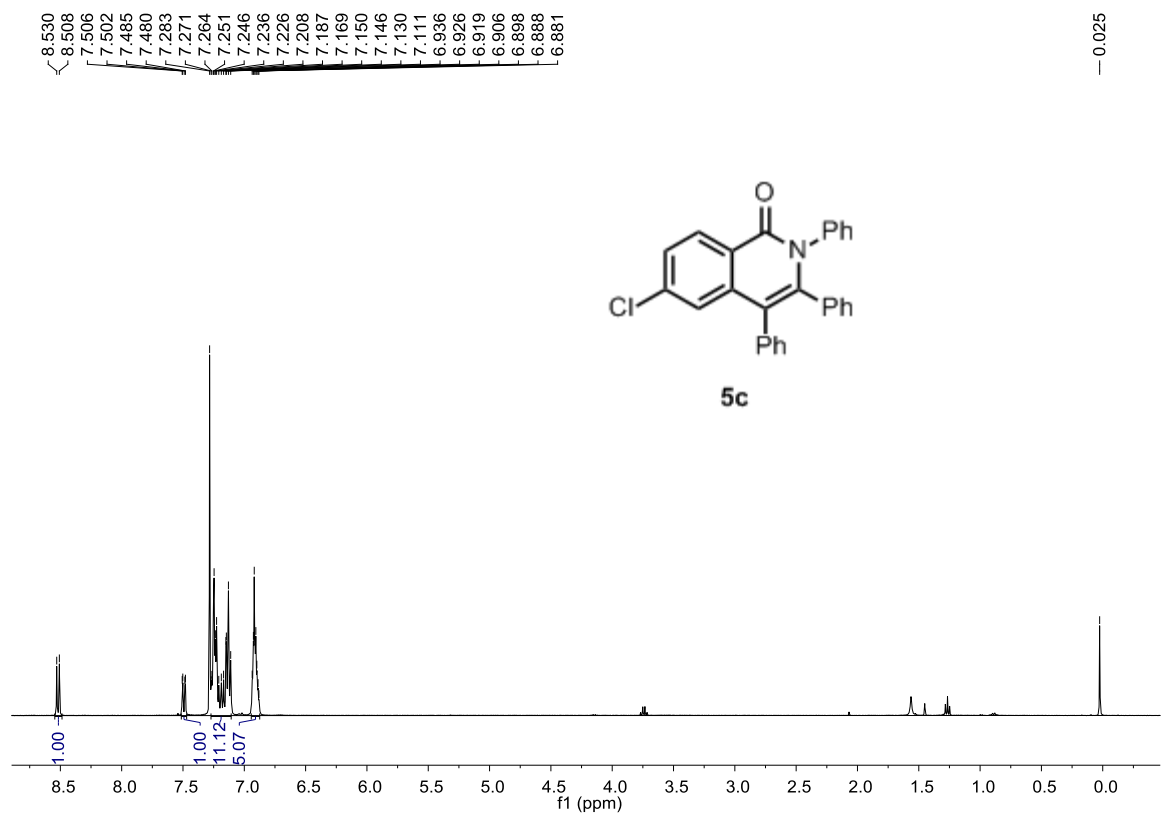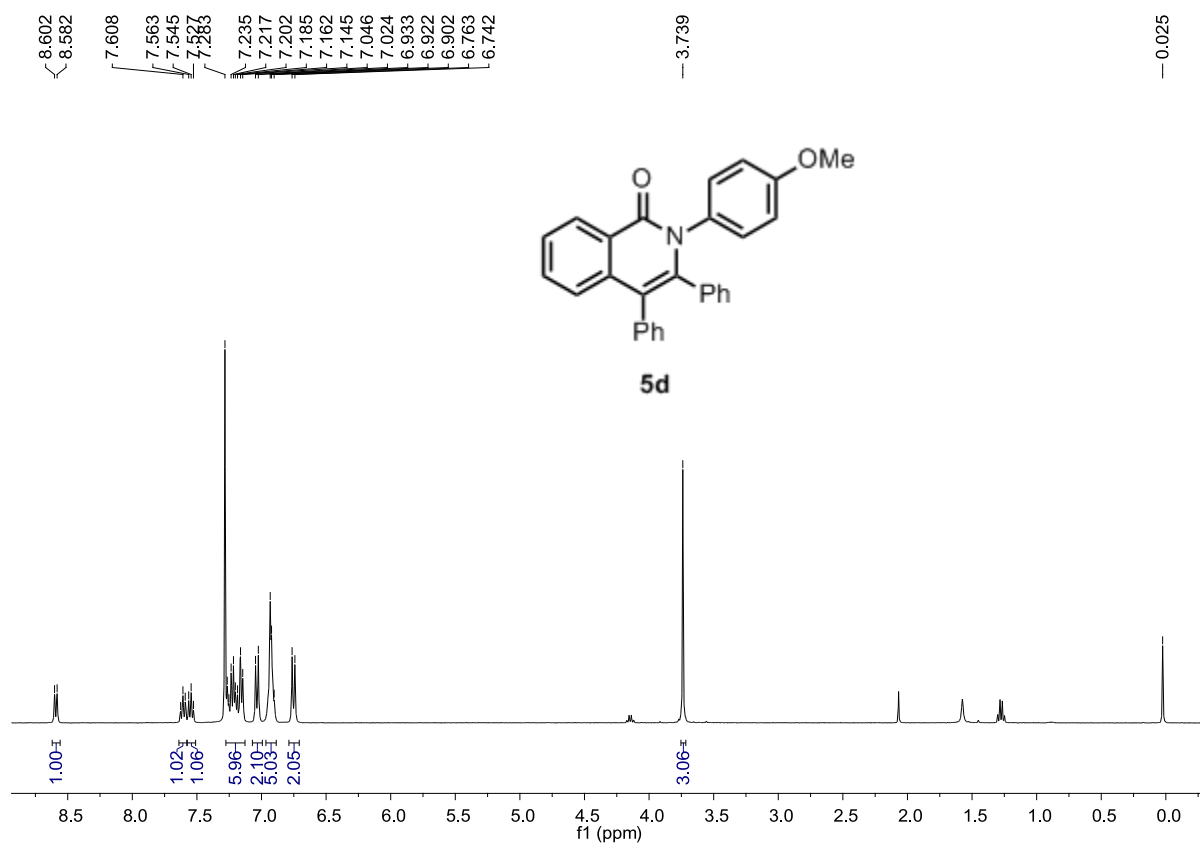

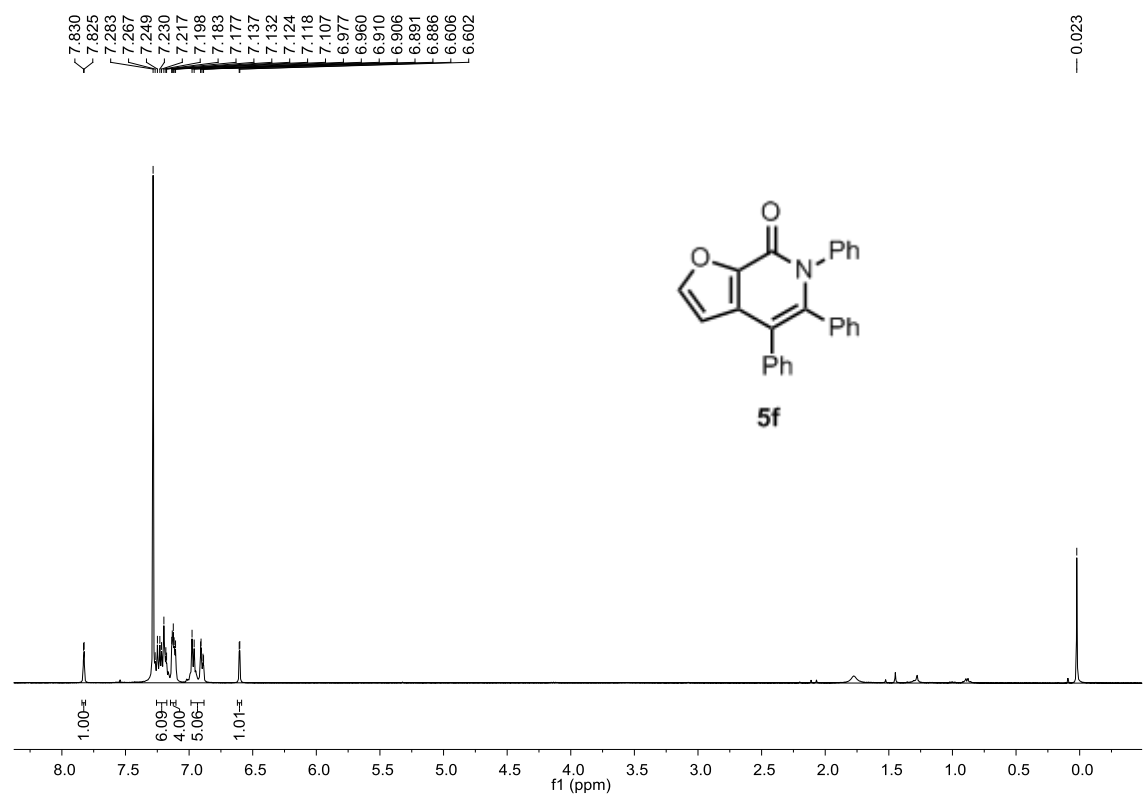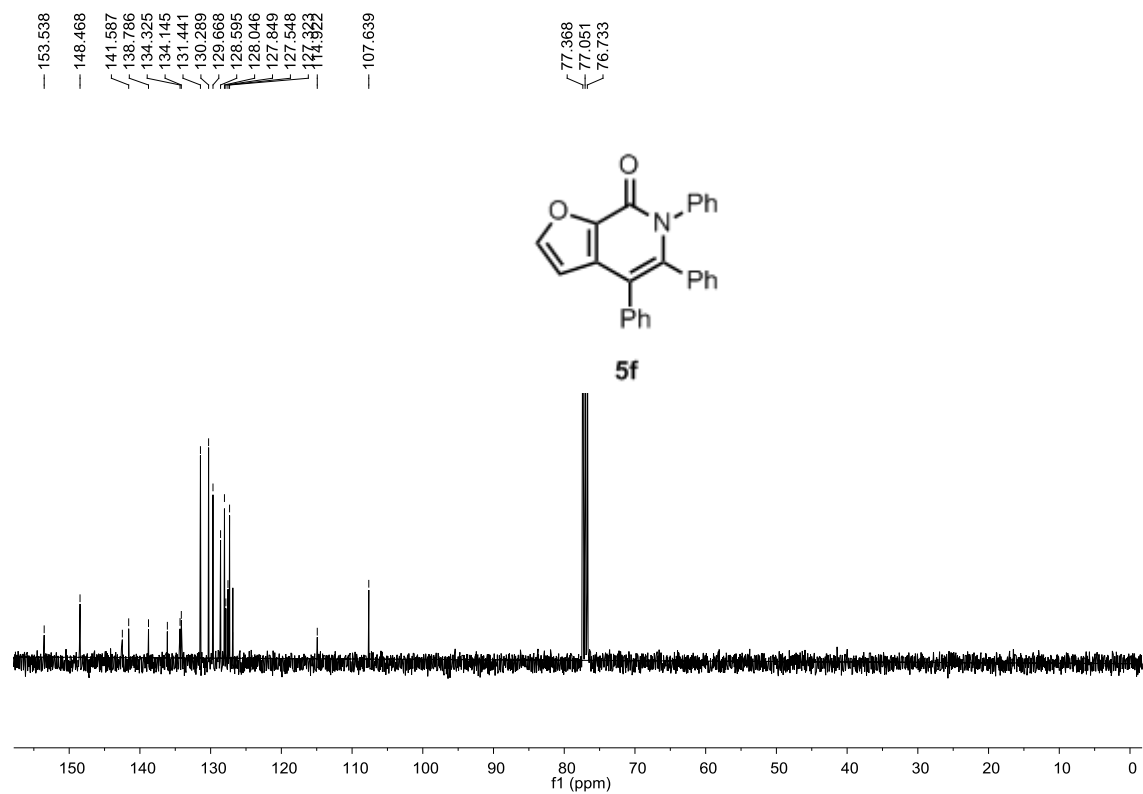

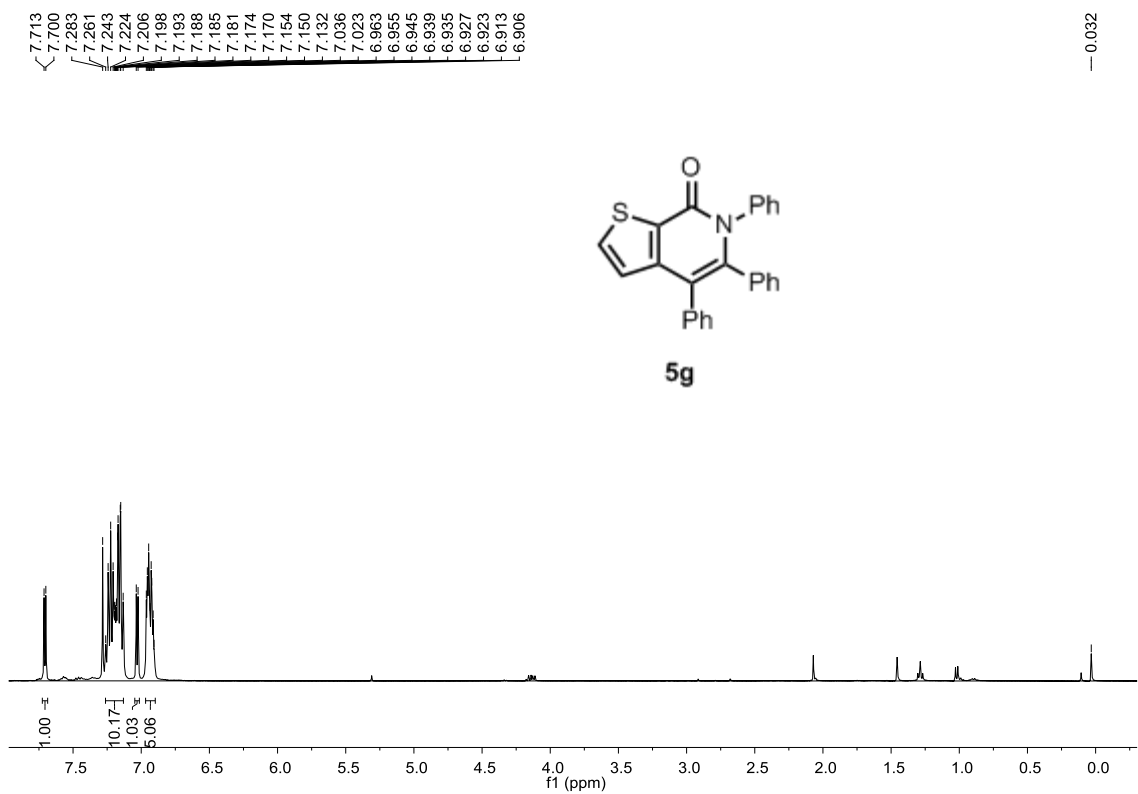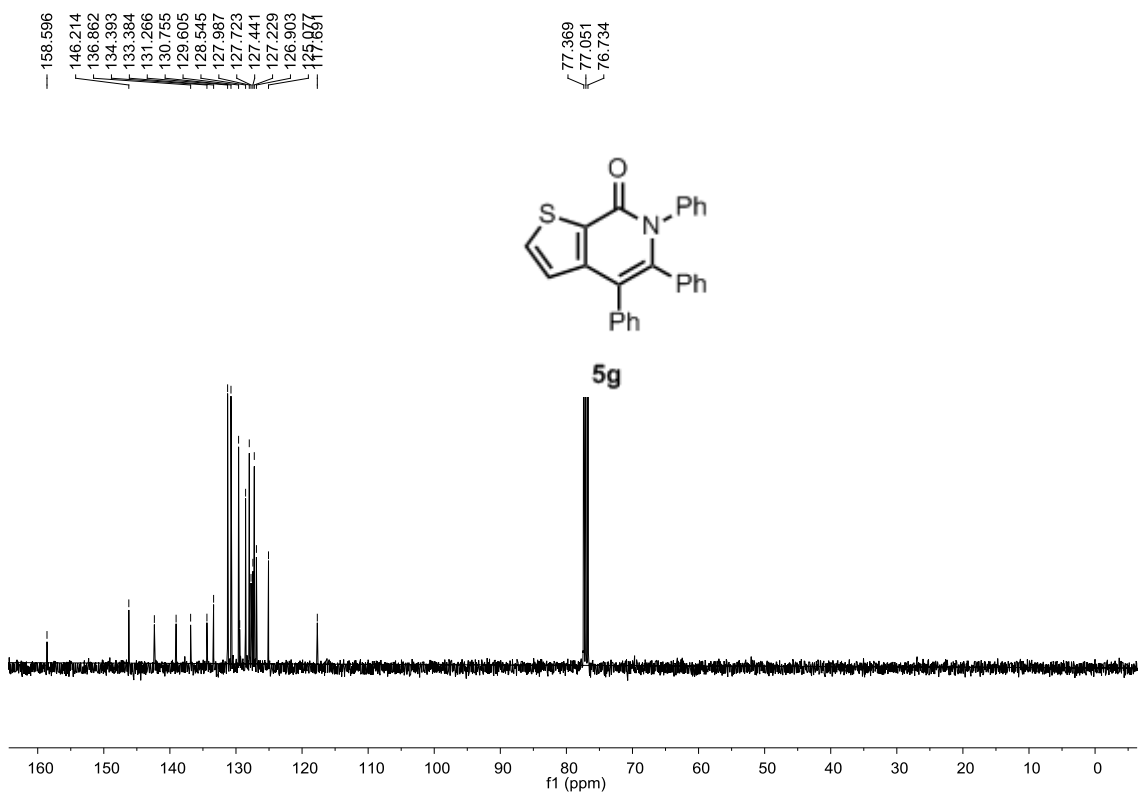

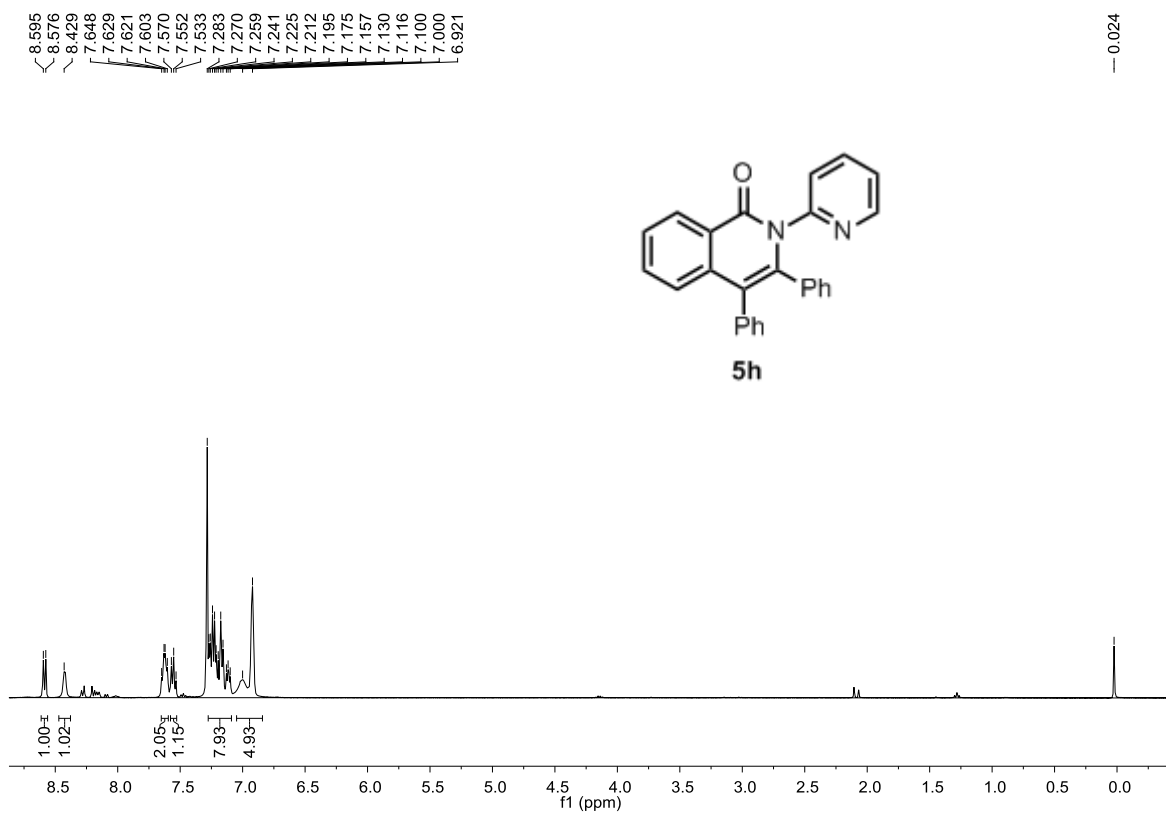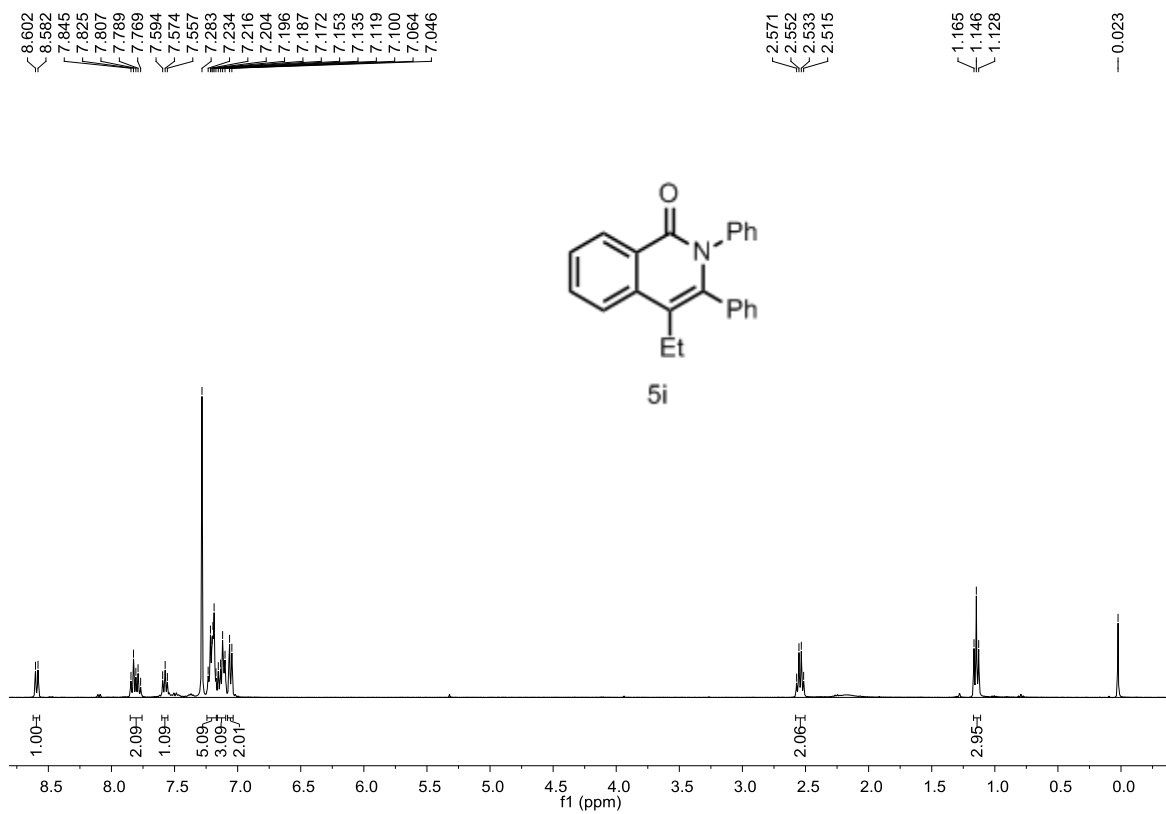

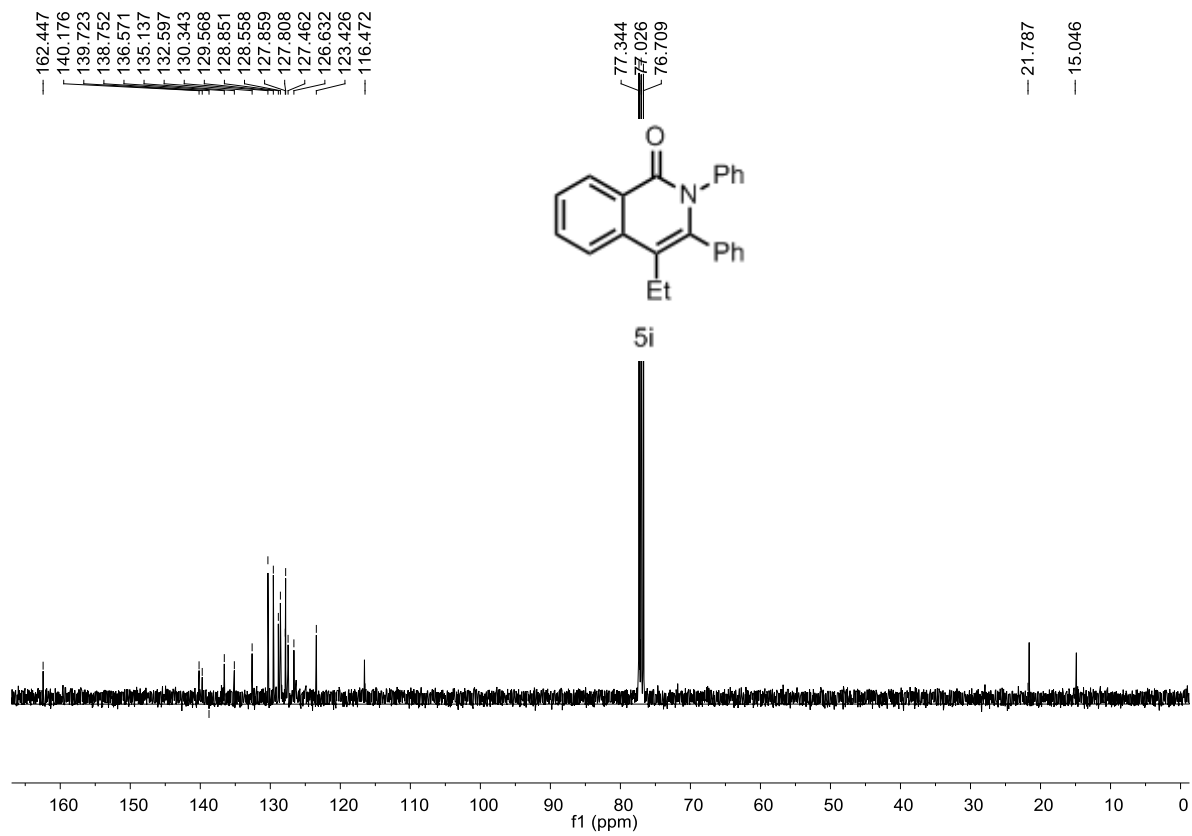

Supplement: c2ob26668g.pdf [file c2ob26668g.pdf]
